# Supplementary material for: Detection of microRNA expression levels based on microarray analysis for classification of idiopathic pulmonary fibrosis
Source: PubMed Central journal article supplement — Exp Ther Med. 2020 Jul 29;20(4):3096–103. doi: 10.3892/etm.2020.9068 (PMC7444334; doi:10.3892/etm.2020.9068), 2020-07-29
Supplement: Supplementary_Data.pdf [file Supplementary_Data.pdf]

Table SI. Patient characteristics.

| Characteristics                                                   | IPF (n=4)        |
|-------------------------------------------------------------------|------------------|
| Age, years                                                        | 63 (56-73)       |
| Sex                                                               |                  |
| Male                                                              | 4                |
| Female                                                            | 0                |
| Modified Medical Research Council<br>breathlessness scale (Grade) | 1.6 (0-3.0)      |
| 1-year mMRC breathlessness scale<br>(Grade)                       | 1.8 (0-3.0)      |
| FVC, l                                                            | 1.86 (0.83-2.32) |

FVC, forced vital capacities.

Table SII. miRNA primers.

| Gene                        | Forward sequence             | Reverse sequence              |
|-----------------------------|------------------------------|-------------------------------|
| <i>hsa-miR-221*</i>         | 5'-CCTGAAACCCAGCAGACAA-3'    | 5'-CAGGTCTGGGGCATGAAC-3'      |
| <i>hsa-miR-524-5p</i>       | 5'-CTACAAAGGGAAGCA-3'        | 5'-GTGCAGGGTCCGAGGT-3'        |
| <i>hsa-miR-194</i>          | 5'-TGTAACAGCAACTCCATGTGG-3'  | 5'-CGCTACGTAACGGCATGACAGTG-3' |
| <i>hsa-miRPlus-E1092</i>    | 5'-TTCGACAATTCCTGTGG-3'      | 5'-CTGATATGATAGGGT-3'         |
| <i>hsa-miR-17</i>           | 5'-TGCTTACAGTGCAGGTAG-3'     | 5'-GAACATGTCTGCGTATCTC-3'     |
| <i>hsa-miR-133a</i>         | 5'-GGGTTTGGTCCCCTTCAA-3'     | 5'-GTGCGTGTCCGTGGAGTCG-3'     |
| <i>U6 small nuclear RNA</i> | 5'-TGCGGGTGCTCGCTTCGGCAGC-3' | 5'-CCAGTGCAGGGTCCGAGGT-3'     |

miR/miRNA, microRNA.

Table SIII. Enrichment results of target gene KEGG with differentially expressed miRNAs.

| Class                 | KEGG name                                                         | ID       | Input number | P-value                |
|-----------------------|-------------------------------------------------------------------|----------|--------------|------------------------|
| <i>miR-124</i>        | Metabolic pathways                                                | hsa01100 | 24           | 1.34x10 <sup>-04</sup> |
|                       | cAMP signaling pathway                                            | hsa04024 | 10           | 9.58x10 <sup>-06</sup> |
|                       | Pathways in cancer                                                | hsa05200 | 10           | 2.05x10 <sup>-03</sup> |
|                       | PI3K/Akt signaling pathway                                        | hsa04151 | 9            | 2.55x10 <sup>-03</sup> |
|                       | Oxytocin signaling pathway                                        | hsa04921 | 7            | 4.36x10 <sup>-04</sup> |
| <i>miR-194</i>        | Signaling pathways regulating pluripotency of stem cells          | hsa04550 | 3            | 1.60x10 <sup>-03</sup> |
|                       | Metabolic pathways                                                | hsa01100 | 3            | 3.15x10 <sup>-01</sup> |
|                       | Lysine degradation                                                | hsa00310 | 2            | 3.34x10 <sup>-03</sup> |
|                       | Epithelial cell signaling in <i>Helicobacter pylori</i> infection | hsa05120 | 2            | 5.55x10 <sup>-03</sup> |
|                       | Wnt signaling pathway                                             | hsa04310 | 2            | 2.22x10 <sup>-02</sup> |
| <i>hsa-miR-524-5p</i> | MAPK signaling pathway                                            | hsa04010 | 20           | 1.0x10 <sup>-06</sup>  |
|                       | Amphetamine addiction                                             | hsa05031 | 14           | 7.6x10 <sup>-06</sup>  |
|                       | cAMP signaling pathway                                            | hsa04024 | 14           | 2.2x10 <sup>-04</sup>  |
|                       | Cocaine addiction                                                 | hsa05030 | 10           | 4.9x10 <sup>-04</sup>  |
|                       | cGMP/PKG signaling pathway                                        | hsa04022 | 11           | 1.6x10 <sup>-03</sup>  |

miR/miRNA, microRNA; KEGG, Kyoto Encyclopedia of Genes and Genomes; MAPK, mitogen-activated protein kinase; PKG, protein kinase G.
